# Supplementary material
Source: PubMed Central journal article supplement (PMC4089165)
Supplement: cei0177-0161-SD1.pdf [file cei0177-0161-SD1.pdf]

# Supplemental Figure 1

## Anti-CSBG IgGMA standard

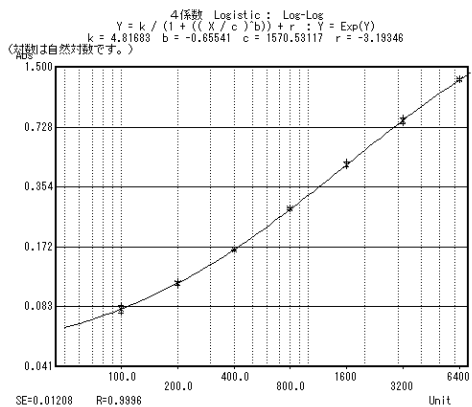

## Anti-CSBG IgG standard

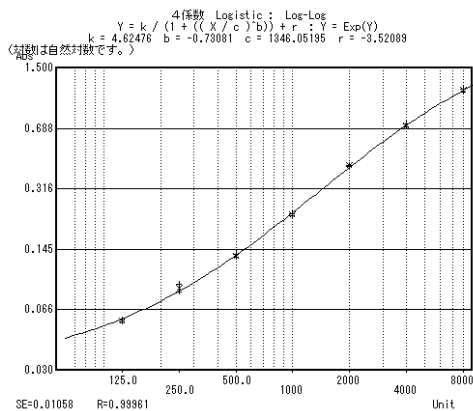

## Anti-CSBG IgM standard

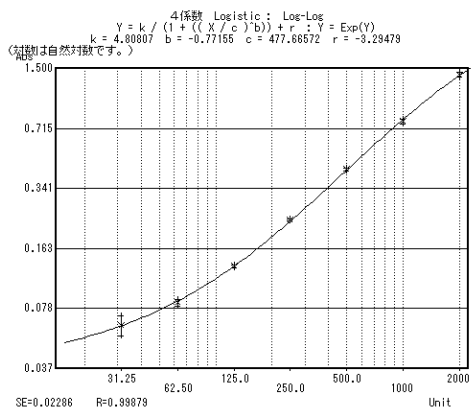

## Anti-CSBG IgA standard

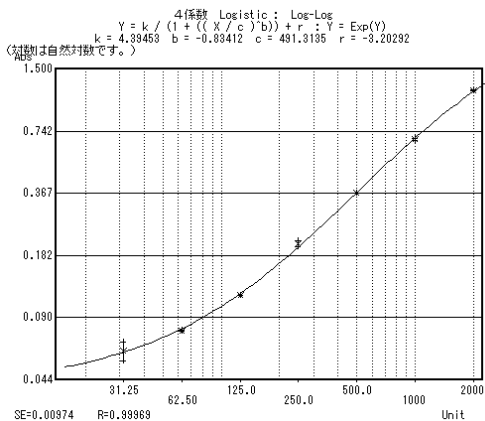

# Standard curves of ELISA of Anti-BG

## Supplemental Figure 2

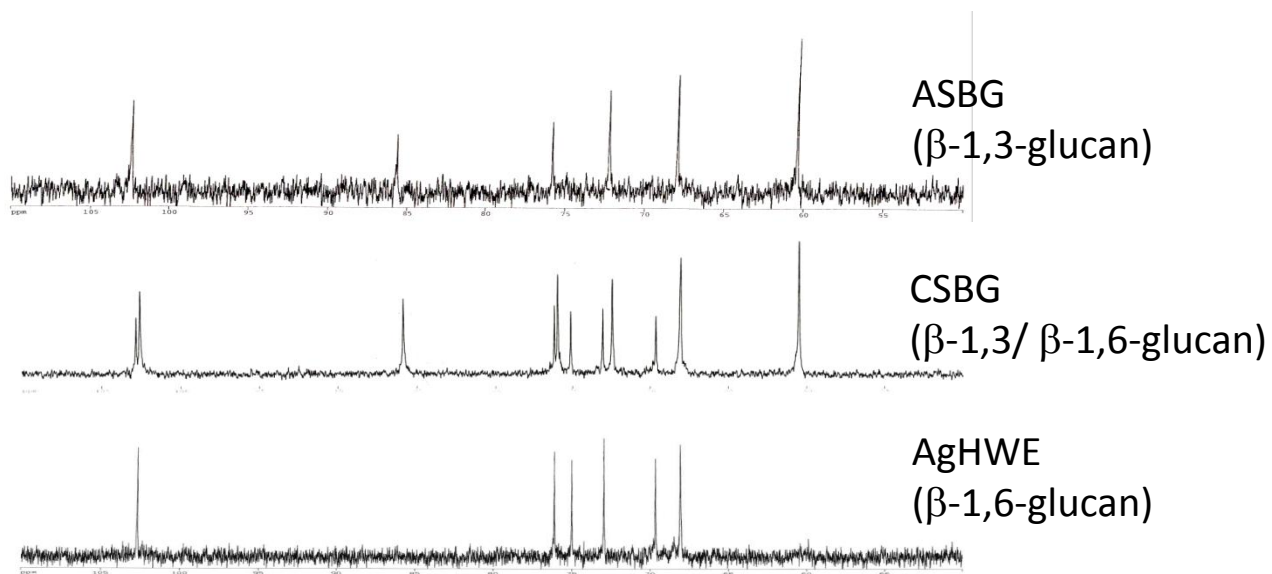

$^{13}\text{C}$ -NMR spectra of CSBG, ASBG and AgHWE in  $\text{DMSO-}d_6$

### Supplemental Figure 3

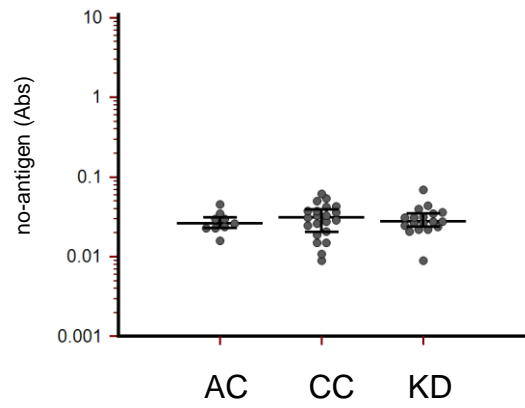

The binding of Ig to no-antigen ELISA plate
